# Supplementary material
Source: PubMed Central journal article supplement (PMC4769027)
Supplement: NIHMS758390-supplement-1.pdf [file NIHMS758390-supplement-1.pdf]

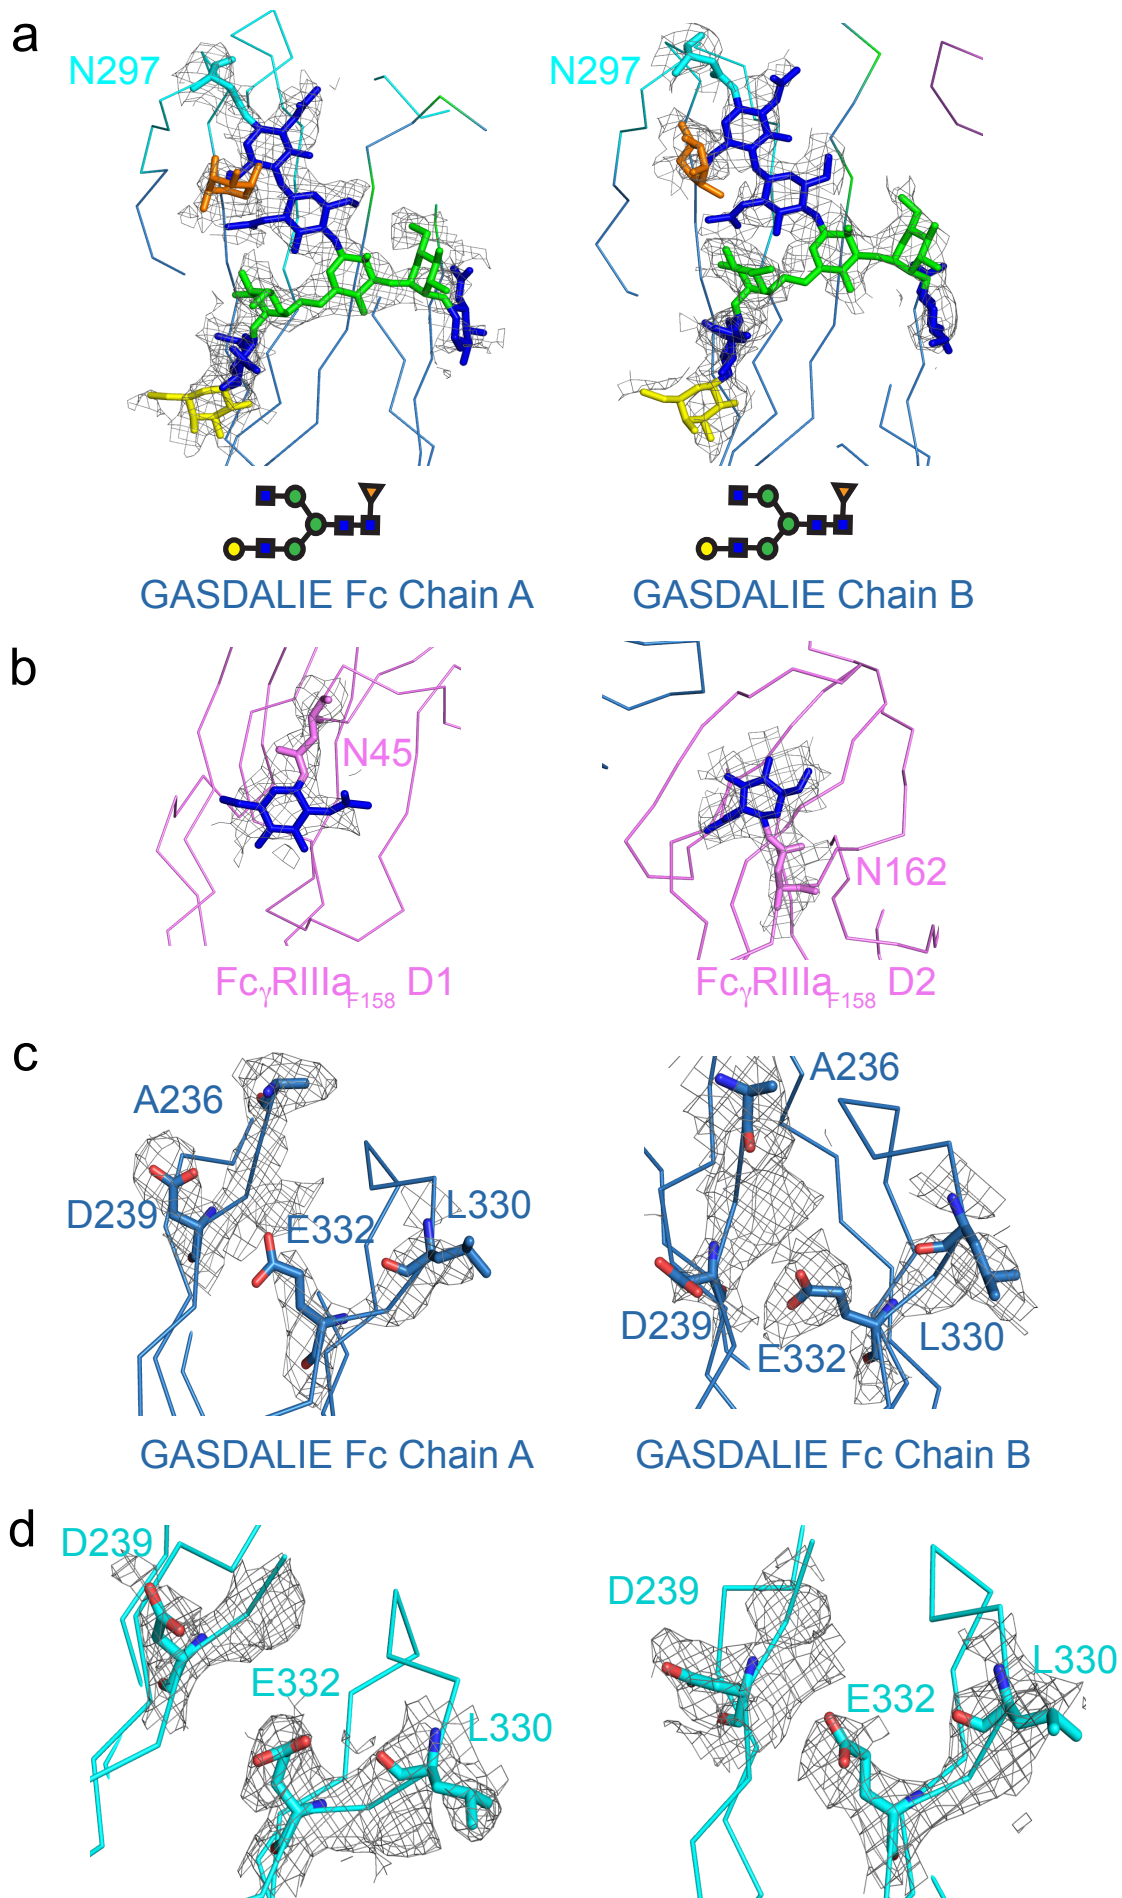

Supplementary Figure 1.  $2F_o-F_c$  electron density contoured at  $0.7\sigma$  from annealed omit maps. (a) Asn297-linked *N*-glycans on  $Fc\gamma RIIIa$ -bound GASDALIE Fc. (b) Asn45- and Asn162-linked *N*-glycans on  $Fc\gamma RIIIa_{F158}$  (c) G236/S239D/A330L/I332E mutations in the  $Fc\gamma RIIIa$ -bound GASDALIE Fc. (d) Unbound GASDALIE Fc. Ordered glycan residues in panels A and B are shown as colored sticks (fucose, orange; GlcNAc, blue; mannose, green; galactose, yellow) with schematic versions of the ordered portions of the Fc *N*-glycans on each chain shown in panel a (fucose, orange triangle; GlcNAc, blue squares; mannose, green circles; galactose, yellow circle).

**Supplementary Table 1.** Data collection and refinement statistics

|                                      | <b>GASDALIE Fc:FcyRIIIa<sub>F158</sub></b>    | <b>GASDALIE Fc</b>                            |
|--------------------------------------|-----------------------------------------------|-----------------------------------------------|
| Data Collection                      |                                               |                                               |
| Space group                          | P2 <sub>1</sub> 2 <sub>1</sub> 2 <sub>1</sub> | P2 <sub>1</sub> 2 <sub>1</sub> 2 <sub>1</sub> |
| Cell dimensions                      |                                               |                                               |
| <i>a</i> , <i>b</i> , <i>c</i> (Å)   | 74.38, 94.50, 108.67                          | 49.32, 79.13, 137.62                          |
| $\alpha$ , $\beta$ , $\gamma$ (°)    | 90.0, 90.0, 90.0                              | 90.0, 90.0, 90.0                              |
| Resolution (Å)                       | 71.31 - 3.13 (3.24 - 3.12)                    | 46.43 - 2.39 (2.47 - 2.38)                    |
| R <sub>merge</sub>                   | 0.11 (1.26)                                   | 0.14 (0.58)                                   |
| Completeness (%)                     | 100.00 (100.00)                               | 100.00 (100.00)                               |
| Redundancy                           | 2.0 (2.0)                                     | 1.9 (1.9)                                     |
| I/ $\sigma$ I                        | 7.52 (0.61)                                   | 6.62 (1.41)                                   |
| CC <sub>1/2</sub> (%)                | 99.9 (79.5)                                   | 99.2 (88.5)                                   |
| Refinement                           |                                               |                                               |
| Resolution (Å)                       | 3.13                                          | 2.39                                          |
| No. reflections                      | 28106                                         | 31591                                         |
| R <sub>work</sub> /R <sub>free</sub> | .270/.296                                     | .241/.258                                     |
| No. atoms                            |                                               |                                               |
| Protein                              | 4507                                          | 3291                                          |
| Ligand/ion                           | 248                                           | 210                                           |
| Water                                | 0                                             | 93                                            |
| Average B factor                     | 35.00                                         | 58.10                                         |
| rmsd                                 |                                               |                                               |
| Bond lengths (Å)                     | 0.015                                         | 0.012                                         |
| Bond angles (°)                      | 1.46                                          | 1.25                                          |

Statistics for the highest-resolution shell are shown in parentheses.
